# Supplementary material for: Why is sulfuric acid a much stronger acid than ethanol? Determination of the contributions by inductive/field effects and electron-delocalization effects
Source: Royal Society of Chemistry journal article supplement (doi:10.1039/c4cp04110k), 2014-10-07
Supplement: c4cp04110k1.pdf [file c4cp04110k1.pdf]

## Why Is Sulfuric Acid a Much Stronger Acid than Ethanol? Contributions by Inductive/Field Effects and Electron-Delocalization Effects.

Kevin Lynch,<sup>†</sup> Adam Maloney,<sup>†</sup> Austin Sowell,<sup>†</sup> Changwei Wang,<sup>‡</sup> Yirong Mo,<sup>§,\*</sup> and Joel M. Karty<sup>†,\*</sup>

<sup>†</sup> Department of Chemistry, Elon University, Elon, NC 27244

[jkarty@elon.edu](mailto:jkarty@elon.edu)

<sup>‡</sup> College of Chemistry & Chemical Engineering, [China University of Petroleum](http://www.cup.edu.cn), Qingdao 266580, China

<sup>§</sup> Department of Chemistry, Western Michigan University, Kalamazoo, MI 49008

[yirong.mo@wmich.edu](mailto:yirong.mo@wmich.edu)

### Table of Contents

|                                                                                                        |     |
|--------------------------------------------------------------------------------------------------------|-----|
| 1. B3LYP/6-311++G(d,p) calculations for H <sub>2</sub> SO <sub>4</sub> and its $n=1-6$ alkylogues..... | S 3 |
| a. H <sub>2</sub> SO <sub>4</sub> ( $n=0$ ).....                                                       | S 3 |
| b. H <sub>2</sub> SO <sub>4</sub> ( $n=1$ ).....                                                       | S 3 |
| c. H <sub>2</sub> SO <sub>4</sub> ( $n=2$ ).....                                                       | S 4 |
| d. H <sub>2</sub> SO <sub>4</sub> ( $n=3$ ).....                                                       | S 5 |
| e. H <sub>2</sub> SO <sub>4</sub> ( $n=4$ ).....                                                       | S 6 |
| f. H <sub>2</sub> SO <sub>4</sub> ( $n=5$ ).....                                                       | S 7 |
| g. H <sub>2</sub> SO <sub>4</sub> ( $n=6$ ).....                                                       | S 8 |
| 2. B3LYP/6-311++G(d,p) calculations for HSO <sub>4</sub> <sup>-</sup> and its $n=1-6$ alkylogues.....  | S 9 |
| a. HSO <sub>4</sub> <sup>-</sup> ( $n=0$ ).....                                                        | S 9 |

|    |                                                                                                    |      |
|----|----------------------------------------------------------------------------------------------------|------|
| b. | $\text{HSO}_4^-$ (n=1)                                                                             | S 9  |
| c. | $\text{HSO}_4^-$ (n=2)                                                                             | S 10 |
| d. | $\text{HSO}_4^-$ (n=3)                                                                             | S 11 |
| e. | $\text{HSO}_4^-$ (n=4)                                                                             | S 12 |
| f. | $\text{HSO}_4^-$ (n=5)                                                                             | S 13 |
| g. | $\text{HSO}_4^-$ (n=6)                                                                             | S 14 |
| 3. | B3LYP/6-311++G(d,p) calculations for $\text{CH}_3\text{CH}_2\text{OH}$ and its $n=1-6$ alkylogues  | S 15 |
| a. | $\text{CH}_3\text{CH}_2\text{OH}$ (n=0)                                                            | S 15 |
| b. | $\text{CH}_3\text{CH}_2\text{OH}$ (n=1)                                                            | S 16 |
| c. | $\text{CH}_3\text{CH}_2\text{OH}$ (n=2)                                                            | S 17 |
| d. | $\text{CH}_3\text{CH}_2\text{OH}$ (n=3)                                                            | S 18 |
| e. | $\text{CH}_3\text{CH}_2\text{OH}$ (n=4)                                                            | S 19 |
| f. | $\text{CH}_3\text{CH}_2\text{OH}$ (n=5)                                                            | S 20 |
| g. | $\text{CH}_3\text{CH}_2\text{OH}$ (n=6)                                                            | S 21 |
| 4. | B3LYP/6-311++G(d,p) calculations for $\text{CH}_3\text{CH}_2\text{O}^-$ and its $n=1-6$ alkylogues | S 22 |
| a. | $\text{CH}_3\text{CH}_2\text{O}^-$ (n=0)                                                           | S 22 |
| b. | $\text{CH}_3\text{CH}_2\text{O}^-$ (n=1)                                                           | S 23 |
| c. | $\text{CH}_3\text{CH}_2\text{O}^-$ (n=2)                                                           | S 24 |
| d. | $\text{CH}_3\text{CH}_2\text{O}^-$ (n=3)                                                           | S 25 |
| e. | $\text{CH}_3\text{CH}_2\text{O}^-$ (n=4)                                                           | S 26 |
| f. | $\text{CH}_3\text{CH}_2\text{O}^-$ (n=5)                                                           | S 27 |
| g. | $\text{CH}_3\text{CH}_2\text{O}^-$ (n=6)                                                           | S 28 |
| 5. | Complete reference <sup>[42]</sup>                                                                 | S 29 |

### 1. B3LYP/6-311++G(p,d) calculations for H<sub>2</sub>SO<sub>4</sub> and its n=1–6 alkylogues

a. H<sub>2</sub>SO<sub>4</sub> (n=0)

energy = -700.3391294 a.u.

thermally corrected enthalpy = -700.294694 a.u.

number of imaginary frequencies = 0

Cartesian Coordinates

| Center<br>Number | Atomic<br>Number | Atomic<br>Type | Coordinates (Angstroms) |           |           |
|------------------|------------------|----------------|-------------------------|-----------|-----------|
|                  |                  |                | X                       | Y         | Z         |
| 1                | 16               | 0              | 0.000000                | 0.000002  | 0.169138  |
| 2                | 8                | 0              | 1.110273                | -0.594451 | -0.859539 |
| 3                | 8                | 0              | 0.551330                | 1.148598  | 0.838177  |
| 4                | 8                | 0              | -0.551329               | -1.148582 | 0.838200  |
| 5                | 8                | 0              | -1.110273               | 0.594434  | -0.859550 |
| 6                | 1                | 0              | 1.671504                | 0.127976  | -1.182263 |
| 7                | 1                | 0              | -1.671505               | -0.127999 | -1.182260 |

b. H<sub>2</sub>SO<sub>4</sub> (n=1)

energy = -778.9866638 a.u.

thermally corrected enthalpy = -778.882523 a.u.

number of imaginary frequencies = 0

Cartesian Coordinates

| Center<br>Number | Atomic<br>Number | Atomic<br>Type | Coordinates (Angstroms) |           |           |
|------------------|------------------|----------------|-------------------------|-----------|-----------|
|                  |                  |                | X                       | Y         | Z         |
| 1                | 16               | 0              | -0.888425               | -0.138730 | 0.014990  |
| 2                | 8                | 0              | -1.828323               | 1.155163  | -0.385420 |
| 3                | 1                | 0              | -2.447319               | 1.309650  | 0.344079  |
| 4                | 8                | 0              | -1.193834               | -0.476005 | 1.401302  |
| 5                | 8                | 0              | -1.015001               | -1.126298 | -1.039146 |
| 6                | 6                | 0              | 0.737027                | 0.636818  | -0.101676 |
| 7                | 1                | 0              | 0.780168                | 1.117801  | -1.079379 |
| 8                | 1                | 0              | 0.782789                | 1.389867  | 0.685153  |
| 9                | 6                | 0              | 1.851130                | -0.392978 | 0.055493  |
| 10               | 1                | 0              | 1.792496                | -1.130894 | -0.750920 |
| 11               | 1                | 0              | 1.751797                | -0.910700 | 1.016336  |
| 12               | 8                | 0              | 3.064531                | 0.351859  | -0.006244 |
| 13               | 1                | 0              | 3.806938                | -0.256830 | 0.058056  |

c. H<sub>2</sub>SO<sub>4</sub> (n=2)

energy = -857.6388247 a.u.

thermally corrected enthalpy = -857.475087 a.u.

number of imaginary frequencies = 0

Cartesian Coordinates

---

| Center<br>Number | Atomic<br>Number | Atomic<br>Type | Coordinates (Angstroms) |           |           |
|------------------|------------------|----------------|-------------------------|-----------|-----------|
|                  |                  |                | X                       | Y         | Z         |
| 1                | 16               | 0              | -1.903954               | -0.148936 | 0.002656  |
| 2                | 8                | 0              | -2.904839               | 1.145730  | -0.232673 |
| 3                | 1                | 0              | -3.578668               | 1.126937  | 0.463572  |
| 4                | 8                | 0              | -2.164038               | -0.647878 | 1.350034  |
| 5                | 8                | 0              | -2.020397               | -1.027114 | -1.146734 |
| 6                | 6                | 0              | -0.315239               | 0.712065  | -0.062376 |
| 7                | 1                | 0              | -0.326114               | 1.269322  | -1.000999 |
| 8                | 1                | 0              | -0.325485               | 1.412524  | 0.774068  |
| 9                | 6                | 0              | 0.853346                | -0.270606 | 0.014024  |
| 10               | 1                | 0              | 0.784195                | -0.974720 | -0.820027 |
| 11               | 1                | 0              | 0.773950                | -0.853578 | 0.936909  |
| 12               | 6                | 0              | 2.197133                | 0.467688  | -0.026749 |
| 13               | 1                | 0              | 2.270231                | 1.170548  | 0.809857  |
| 14               | 1                | 0              | 2.277769                | 1.057073  | -0.946267 |
| 15               | 6                | 0              | 3.381749                | -0.485743 | 0.039697  |
| 16               | 1                | 0              | 3.348640                | -1.184677 | -0.807307 |
| 17               | 1                | 0              | 3.338211                | -1.075134 | 0.965947  |
| 18               | 8                | 0              | 4.572143                | 0.301275  | -0.001826 |
| 19               | 1                | 0              | 5.335647                | -0.281849 | 0.043753  |

---

d. H<sub>2</sub>SO<sub>4</sub> (n=3)

energy = -936.2880965 a.u.

thermally corrected enthalpy = -936.064933 a.u.

number of imaginary frequencies = 0

Cartesian Coordinates

| Center<br>Number | Atomic<br>Number | Atomic<br>Type | Coordinates (Angstroms) |           |           |
|------------------|------------------|----------------|-------------------------|-----------|-----------|
|                  |                  |                | X                       | Y         | Z         |
| 1                | 16               | 0              | -3.008851               | -0.168111 | 0.002340  |
| 2                | 8                | 0              | -4.044154               | 1.105549  | -0.201657 |
| 3                | 1                | 0              | -4.724550               | 1.044278  | 0.485634  |
| 4                | 8                | 0              | -3.251192               | -0.701258 | 1.339913  |
| 5                | 8                | 0              | -3.108546               | -1.025741 | -1.164261 |
| 6                | 6                | 0              | -1.444063               | 0.735748  | -0.050556 |
| 7                | 1                | 0              | -1.474268               | 1.311142  | -0.977875 |
| 8                | 1                | 0              | -1.471743               | 1.419107  | 0.799677  |
| 9                | 6                | 0              | -0.247544               | -0.214757 | 0.002688  |
| 10               | 1                | 0              | -0.297120               | -0.903960 | -0.845047 |
| 11               | 1                | 0              | -0.305148               | -0.819104 | 0.913291  |
| 12               | 6                | 0              | 1.079877                | 0.554731  | -0.026231 |
| 13               | 1                | 0              | 1.120218                | 1.247816  | 0.822858  |
| 14               | 1                | 0              | 1.124357                | 1.172509  | -0.931451 |
| 15               | 6                | 0              | 2.301590                | -0.370219 | 0.016220  |
| 16               | 1                | 0              | 2.257844                | -1.061814 | -0.834305 |
| 17               | 1                | 0              | 2.251234                | -0.991167 | 0.919354  |
| 18               | 6                | 0              | 3.629419                | 0.393950  | -0.009460 |
| 19               | 1                | 0              | 3.686970                | 1.077154  | 0.844987  |
| 20               | 1                | 0              | 3.690145                | 1.012294  | -0.911758 |
| 21               | 6                | 0              | 4.841100                | -0.524900 | 0.026466  |
| 22               | 1                | 0              | 4.824095                | -1.202772 | -0.838401 |
| 23               | 1                | 0              | 4.819139                | -1.140474 | 0.936697  |
| 24               | 8                | 0              | 6.014813                | 0.290752  | 0.001174  |
| 25               | 1                | 0              | 6.790799                | -0.276973 | 0.022782  |

e. H<sub>2</sub>SO<sub>4</sub> (n=4)

energy = -1014.9369871 a.u.

thermally corrected enthalpy = -1014.654417 a.u.

number of imaginary frequencies = 0

Cartesian Coordinates

| Center<br>Number | Atomic<br>Number | Atomic<br>Type | Coordinates (Angstroms) |           |           |
|------------------|------------------|----------------|-------------------------|-----------|-----------|
|                  |                  |                | X                       | Y         | Z         |
| 1                | 16               | 0              | -4.163980               | -0.189351 | 0.002704  |
| 2                | 8                | 0              | -5.220224               | 1.069660  | -0.187619 |
| 3                | 1                | 0              | -5.898869               | 0.989969  | 0.499513  |
| 4                | 8                | 0              | -4.395364               | -0.738232 | 1.335899  |
| 5                | 8                | 0              | -4.252885               | -1.037951 | -1.171387 |
| 6                | 6                | 0              | -2.614039               | 0.739884  | -0.045152 |
| 7                | 1                | 0              | -2.655107               | 1.321978  | -0.967871 |
| 8                | 1                | 0              | -2.651709               | 1.415946  | 0.810537  |
| 9                | 6                | 0              | -1.401904               | -0.191115 | -0.001027 |
| 10               | 1                | 0              | -1.440816               | -0.874019 | -0.854363 |
| 11               | 1                | 0              | -1.448263               | -0.803973 | 0.904484  |
| 12               | 6                | 0              | -0.086976               | 0.600080  | -0.024739 |
| 13               | 1                | 0              | -0.058056               | 1.286845  | 0.830247  |
| 14               | 1                | 0              | -0.054678               | 1.226614  | -0.924728 |
| 15               | 6                | 0              | 1.150296                | -0.304199 | 0.008562  |
| 16               | 1                | 0              | 1.119434                | -0.989611 | -0.847562 |
| 17               | 1                | 0              | 1.113381                | -0.934677 | 0.905764  |
| 18               | 6                | 0              | 2.470368                | 0.474228  | -0.011305 |
| 19               | 1                | 0              | 2.502615                | 1.156233  | 0.847727  |
| 20               | 1                | 0              | 2.503893                | 1.109204  | -0.905625 |
| 21               | 6                | 0              | 3.709853                | -0.427530 | 0.013496  |
| 22               | 1                | 0              | 3.676753                | -1.107456 | -0.847436 |
| 23               | 1                | 0              | 3.673598                | -1.064233 | 0.906791  |
| 24               | 6                | 0              | 5.025933                | 0.357368  | -0.003423 |
| 25               | 1                | 0              | 5.073449                | 1.029786  | 0.860237  |
| 26               | 1                | 0              | 5.074826                | 0.989521  | -0.896915 |
| 27               | 6                | 0              | 6.252433                | -0.541622 | 0.018147  |
| 28               | 1                | 0              | 6.244765                | -1.208366 | -0.855578 |
| 29               | 1                | 0              | 6.242090                | -1.169591 | 0.920163  |
| 30               | 8                | 0              | 7.414970                | 0.291376  | 0.001737  |
| 31               | 1                | 0              | 8.198613                | -0.265954 | 0.014960  |

f. H<sub>2</sub>SO<sub>4</sub> (n=5)

energy = -1093.5857547 a.u.

thermally corrected enthalpy = -1093.243776 a.u.

number of imaginary frequencies = 0

Cartesian Coordinates

| Center<br>Number | Atomic<br>Number | Atomic<br>Type | Coordinates (Angstroms) |           |           |
|------------------|------------------|----------------|-------------------------|-----------|-----------|
|                  |                  |                | X                       | Y         | Z         |
| 1                | 16               | 0              | -5.350552               | -0.210191 | 0.003117  |
| 2                | 8                | 0              | -6.420832               | 1.038279  | -0.179236 |
| 3                | 1                | 0              | -7.097626               | 0.947288  | 0.508310  |
| 4                | 8                | 0              | -5.574245               | -0.768332 | 1.333790  |
| 5                | 8                | 0              | -5.432067               | -1.053657 | -1.175209 |
| 6                | 6                | 0              | -3.810834               | 0.735962  | -0.041933 |
| 7                | 1                | 0              | -3.858849               | 1.321371  | -0.962217 |
| 8                | 1                | 0              | -3.855241               | 1.407986  | 0.816616  |
| 9                | 6                | 0              | -2.588643               | -0.182045 | -0.002441 |
| 10               | 1                | 0              | -2.620718               | -0.861813 | -0.858558 |
| 11               | 1                | 0              | -2.627752               | -0.799135 | 0.900528  |
| 12               | 6                | 0              | -1.282252               | 0.623256  | -0.023682 |
| 13               | 1                | 0              | -1.260365               | 1.307013  | 0.833963  |
| 14               | 1                | 0              | -1.257156               | 1.253594  | -0.921270 |
| 15               | 6                | 0              | -0.035282               | -0.267775 | 0.005607  |
| 16               | 1                | 0              | -0.059141               | -0.950132 | -0.853166 |
| 17               | 1                | 0              | -0.065074               | -0.902309 | 0.900188  |
| 18               | 6                | 0              | 1.277032                | 0.524033  | -0.011632 |
| 19               | 1                | 0              | 1.302050                | 1.202447  | 0.850813  |
| 20               | 1                | 0              | 1.302054                | 1.164224  | -0.902827 |
| 21               | 6                | 0              | 2.526302                | -0.363992 | 0.007380  |
| 22               | 1                | 0              | 2.502349                | -1.039955 | -0.857031 |
| 23               | 1                | 0              | 2.499539                | -1.007072 | 0.896498  |
| 24               | 6                | 0              | 3.838977                | 0.427159  | -0.005272 |
| 25               | 1                | 0              | 3.864332                | 1.101277  | 0.860305  |
| 26               | 1                | 0              | 3.865265                | 1.071765  | -0.893033 |
| 27               | 6                | 0              | 5.088717                | -0.460607 | 0.010282  |
| 28               | 1                | 0              | 5.062168                | -1.133670 | -0.856395 |
| 29               | 1                | 0              | 5.060476                | -1.105537 | 0.898071  |
| 30               | 6                | 0              | 6.396728                | 0.337936  | -0.001259 |
| 31               | 1                | 0              | 6.437350                | 1.004652  | 0.867183  |
| 32               | 1                | 0              | 6.438651                | 0.977084  | -0.890133 |
| 33               | 6                | 0              | 7.632425                | -0.548367 | 0.013602  |
| 34               | 1                | 0              | 7.630950                | -1.209457 | -0.864476 |
| 35               | 1                | 0              | 7.629082                | -1.182343 | 0.911476  |
| 36               | 8                | 0              | 8.787328                | 0.295819  | 0.001941  |
| 37               | 1                | 0              | 9.575991                | -0.254447 | 0.011092  |

g. H<sub>2</sub>SO<sub>4</sub> (n=6)

energy = -1172.2344571 a.u.

thermally corrected enthalpy = -1171.833071 a.u.

number of imaginary frequencies = 0

Cartesian Coordinates

| Center<br>Number | Atomic<br>Number | Atomic<br>Type | Coordinates (Angstroms) |           |           |
|------------------|------------------|----------------|-------------------------|-----------|-----------|
|                  |                  |                | X                       | Y         | Z         |
| 1                | 16               | 0              | -6.558627               | -0.228793 | 0.003619  |
| 2                | 8                | 0              | -7.637569               | 1.012657  | -0.176174 |
| 3                | 1                | 0              | -8.312987               | 0.916183  | 0.511968  |
| 4                | 8                | 0              | -6.778329               | -0.790918 | 1.333285  |
| 5                | 8                | 0              | -6.634717               | -1.070527 | -1.176298 |
| 6                | 6                | 0              | -5.025457               | 0.727968  | -0.039773 |
| 7                | 1                | 0              | -5.077878               | 1.315341  | -0.958556 |
| 8                | 1                | 0              | -5.074185               | 1.397479  | 0.820507  |
| 9                | 6                | 0              | -3.796870               | -0.181617 | -0.003095 |
| 10               | 1                | 0              | -3.824105               | -0.858755 | -0.861453 |
| 11               | 1                | 0              | -3.831682               | -0.801990 | 0.897795  |
| 12               | 6                | 0              | -2.496204               | 0.632949  | -0.021508 |
| 13               | 1                | 0              | -2.478762               | 1.313226  | 0.839011  |
| 14               | 1                | 0              | -2.476043               | 1.267280  | -0.916423 |
| 15               | 6                | 0              | -1.242804               | -0.249205 | 0.003287  |
| 16               | 1                | 0              | -1.262238               | -0.928141 | -0.858295 |
| 17               | 1                | 0              | -1.267484               | -0.887693 | 0.895208  |
| 18               | 6                | 0              | 0.063770                | 0.552113  | -0.011354 |
| 19               | 1                | 0              | 0.083660                | 1.228109  | 0.853172  |
| 20               | 1                | 0              | 0.084081                | 1.195242  | -0.900596 |
| 21               | 6                | 0              | 1.319698                | -0.326541 | 0.005117  |
| 22               | 1                | 0              | 1.300297                | -1.001021 | -0.860557 |
| 23               | 1                | 0              | 1.298318                | -0.971682 | 0.892864  |
| 24               | 6                | 0              | 2.627022                | 0.473745  | -0.006790 |
| 25               | 1                | 0              | 2.646880                | 1.146886  | 0.860036  |
| 26               | 1                | 0              | 2.647106                | 1.120585  | -0.893413 |
| 27               | 6                | 0              | 3.883771                | -0.403804 | 0.006505  |
| 28               | 1                | 0              | 3.864702                | -1.075681 | -0.861364 |
| 29               | 1                | 0              | 3.862930                | -1.051915 | 0.892250  |
| 30               | 6                | 0              | 5.190497                | 0.397228  | -0.002995 |
| 31               | 1                | 0              | 5.210765                | 1.067973  | 0.865366  |
| 32               | 1                | 0              | 5.211603                | 1.045899  | -0.887956 |
| 33               | 6                | 0              | 6.447379                | -0.480539 | 0.008637  |
| 34               | 1                | 0              | 6.425811                | -1.150494 | -0.860635 |
| 35               | 1                | 0              | 6.424575                | -1.129175 | 0.893920  |
| 36               | 6                | 0              | 7.749241                | 0.328103  | -0.000294 |
| 37               | 1                | 0              | 7.784939                | 0.991859  | 0.870633  |



|    |   |   |           |           |           |
|----|---|---|-----------|-----------|-----------|
| 38 | 1 | 0 | 7.785835  | 0.970938  | -0.886746 |
| 39 | 6 | 0 | 8.991738  | -0.548639 | 0.010788  |
| 40 | 1 | 0 | 8.994854  | -1.206620 | -0.869630 |
| 41 | 1 | 0 | 8.993726  | -1.185805 | 0.906406  |
| 42 | 8 | 0 | 10.140552 | 0.304112  | 0.001525  |
| 43 | 1 | 0 | 10.933142 | -0.240497 | 0.008723  |

---

## 2. B3LYP/6-311++G(p,d) calculations for HSO<sub>4</sub><sup>-</sup> and its n=1–6 alkylogues

### a. HSO<sub>4</sub><sup>-</sup> (n=0)

energy = -699.8367546 a.u.

thermally corrected enthalpy = -699.804676 a.u.

number of imaginary frequencies = 0

Cartesian Coordinates

---

| Center<br>Number | Atomic<br>Number | Atomic<br>Type | Coordinates (Angstroms) |           |           |
|------------------|------------------|----------------|-------------------------|-----------|-----------|
|                  |                  |                | X                       | Y         | Z         |
| 1                | 16               | 0              | 0.156350                | -0.022050 | 0.000250  |
| 2                | 8                | 0              | 0.825553                | 1.286369  | 0.002808  |
| 3                | 8                | 0              | 0.299242                | -0.817727 | 1.239568  |
| 4                | 8                | 0              | 0.305502                | -0.816003 | -1.239401 |
| 5                | 8                | 0              | -1.494613               | 0.440196  | -0.003232 |
| 6                | 1                | 0              | -1.987081               | -0.389878 | -0.001942 |

---

### b. HSO<sub>4</sub><sup>-</sup> (n=1)

energy = -778.4093567 a.u.

thermally corrected enthalpy = -778.321126 a.u.

number of imaginary frequencies = 0

Cartesian Coordinates

---

|    |    |   |           |           |           |
|----|----|---|-----------|-----------|-----------|
| 1  | 16 | 0 | -0.833574 | -0.136871 | 0.012089  |
| 2  | 8  | 0 | -1.892717 | 1.151116  | -0.361967 |
| 3  | 1  | 0 | -2.127880 | 1.550889  | 0.486529  |
| 4  | 8  | 0 | -1.124311 | -0.453591 | 1.417488  |
| 5  | 8  | 0 | -1.106215 | -1.130724 | -1.020095 |
| 6  | 6  | 0 | 0.823319  | 0.562453  | -0.166174 |
| 7  | 1  | 0 | 0.873939  | 0.933842  | -1.190349 |
| 8  | 1  | 0 | 0.867892  | 1.392678  | 0.540468  |
| 9  | 6  | 0 | 2.083835  | -0.389843 | 0.102116  |
| 10 | 1  | 0 | 1.963223  | -1.248532 | -0.606995 |
| 11 | 1  | 0 | 1.922552  | -0.818939 | 1.124639  |
| 12 | 8  | 0 | 3.172560  | 0.351241  | -0.055847 |

---

c.  $\text{HSO}_4^-$  (n=2)

energy = -857.0433579 a.u.

thermally corrected enthalpy = -856.896210 a.u.

number of imaginary frequencies = 0

Cartesian Coordinates

| Center<br>Number | Atomic<br>Number | Atomic<br>Type | Coordinates (Angstroms) |           |           |
|------------------|------------------|----------------|-------------------------|-----------|-----------|
|                  |                  |                | X                       | Y         | Z         |
| 1                | 16               | 0              | -1.858006               | -0.151391 | 0.001254  |
| 2                | 8                | 0              | -2.897124               | 1.152037  | -0.201548 |
| 3                | 1                | 0              | -3.275435               | 1.340573  | 0.668875  |
| 4                | 8                | 0              | -2.105005               | -0.641321 | 1.359314  |
| 5                | 8                | 0              | -2.080409               | -1.016194 | -1.145918 |
| 6                | 6                | 0              | -0.234372               | 0.665992  | -0.112051 |
| 7                | 1                | 0              | -0.256541               | 1.175853  | -1.077270 |
| 8                | 1                | 0              | -0.246484               | 1.408424  | 0.688468  |
| 9                | 6                | 0              | 0.948481                | -0.290051 | 0.012019  |
| 10               | 1                | 0              | 0.902282                | -1.036122 | -0.787617 |
| 11               | 1                | 0              | 0.888182                | -0.826625 | 0.964663  |
| 12               | 6                | 0              | 2.277559                | 0.476100  | -0.066387 |
| 13               | 1                | 0              | 2.332115                | 1.228360  | 0.730993  |
| 14               | 1                | 0              | 2.355441                | 1.009751  | -1.022170 |
| 15               | 6                | 0              | 3.556560                | -0.435362 | 0.066422  |
| 16               | 1                | 0              | 3.418387                | -1.227563 | -0.736579 |
| 17               | 1                | 0              | 3.388806                | -1.009827 | 1.032913  |
| 18               | 8                | 0              | 4.699034                | 0.237898  | 0.002857  |

d.  $\text{HSO}_4^-$  (n=3)

energy = -935.6851257 a.u.

thermally corrected enthalpy = -935.478610 a.u.

number of imaginary frequencies = 0

Cartesian Coordinates

| Center<br>Number | Atomic<br>Number | Atomic<br>Type | Coordinates (Angstroms) |           |           |
|------------------|------------------|----------------|-------------------------|-----------|-----------|
|                  |                  |                | X                       | Y         | Z         |
| 1                | 16               | 0              | -2.961547               | -0.166738 | 0.004565  |
| 2                | 8                | 0              | -4.009834               | 1.118940  | -0.158414 |
| 3                | 1                | 0              | -4.455787               | 1.228580  | 0.693719  |
| 4                | 8                | 0              | -3.185593               | -0.700899 | 1.347259  |
| 5                | 8                | 0              | -3.147515               | -1.000939 | -1.168748 |
| 6                | 6                | 0              | -1.371431               | 0.691331  | -0.085896 |
| 7                | 1                | 0              | -1.404976               | 1.244534  | -1.026735 |
| 8                | 1                | 0              | -1.382155               | 1.397677  | 0.746586  |
| 9                | 6                | 0              | -0.173862               | -0.256704 | -0.016188 |
| 10               | 1                | 0              | -0.217205               | -0.962460 | -0.850644 |
| 11               | 1                | 0              | -0.222369               | -0.840896 | 0.907768  |
| 12               | 6                | 0              | 1.146559                | 0.532042  | -0.063937 |
| 13               | 1                | 0              | 1.167210                | 1.249506  | 0.766721  |
| 14               | 1                | 0              | 1.177416                | 1.128422  | -0.985078 |
| 15               | 6                | 0              | 2.395476                | -0.354986 | 0.006165  |
| 16               | 1                | 0              | 2.374057                | -1.069776 | -0.828066 |
| 17               | 1                | 0              | 2.354925                | -0.957397 | 0.924407  |
| 18               | 6                | 0              | 3.714185                | 0.422866  | -0.028377 |
| 19               | 1                | 0              | 3.757040                | 1.134281  | 0.807737  |
| 20               | 1                | 0              | 3.782586                | 1.013726  | -0.952018 |
| 21               | 6                | 0              | 5.004215                | -0.468308 | 0.051985  |
| 22               | 1                | 0              | 4.875634                | -1.222984 | -0.791496 |
| 23               | 1                | 0              | 4.848403                | -1.101170 | 0.986418  |
| 24               | 8                | 0              | 6.147831                | 0.211440  | 0.023043  |

e.  $\text{HSO}_4^-$  (n=4)

energy = -1014.3307749 a.u.

thermally corrected enthalpy = -1014.064863 a.u.

number of imaginary frequencies = 0

Cartesian Coordinates

---

| Center<br>Number | Atomic<br>Number | Atomic<br>Type | Coordinates (Angstroms) |           |           |
|------------------|------------------|----------------|-------------------------|-----------|-----------|
|                  |                  |                | X                       | Y         | Z         |
| 1                | 16               | 0              | -4.115322               | -0.181876 | 0.009604  |
| 2                | 8                | 0              | -5.172447               | 1.091277  | -0.142472 |
| 3                | 1                | 0              | -5.663708               | 1.154839  | 0.689507  |
| 4                | 8                | 0              | -4.327673               | -0.731850 | 1.346842  |
| 5                | 8                | 0              | -4.277831               | -1.009124 | -1.171329 |
| 6                | 6                | 0              | -2.540373               | 0.702927  | -0.072158 |
| 7                | 1                | 0              | -2.582964               | 1.271640  | -1.003224 |
| 8                | 1                | 0              | -2.554977               | 1.394321  | 0.772477  |
| 9                | 6                | 0              | -1.335663               | -0.237827 | -0.024154 |
| 10               | 1                | 0              | -1.379221               | -0.928491 | -0.871054 |
| 11               | 1                | 0              | -1.379063               | -0.840122 | 0.888378  |
| 12               | 6                | 0              | -0.021344               | 0.556490  | -0.061151 |
| 13               | 1                | 0              | 0.002559                | 1.255890  | 0.784376  |
| 14               | 1                | 0              | 0.004839                | 1.172103  | -0.969399 |
| 15               | 6                | 0              | 1.229046                | -0.329519 | -0.016049 |
| 16               | 1                | 0              | 1.212404                | -1.023221 | -0.866528 |
| 17               | 1                | 0              | 1.198706                | -0.952989 | 0.886950  |
| 18               | 6                | 0              | 2.538966                | 0.469708  | -0.036870 |
| 19               | 1                | 0              | 2.548407                | 1.164180  | 0.814141  |
| 20               | 1                | 0              | 2.562496                | 1.097132  | -0.938203 |
| 21               | 6                | 0              | 3.803867                | -0.396601 | 0.007074  |
| 22               | 1                | 0              | 3.791909                | -1.089277 | -0.846569 |
| 23               | 1                | 0              | 3.773327                | -1.027088 | 0.907313  |
| 24               | 6                | 0              | 5.114992                | 0.394955  | -0.006614 |
| 25               | 1                | 0              | 5.151790                | 1.082163  | 0.850069  |
| 26               | 1                | 0              | 5.174116                | 1.015153  | -0.911781 |
| 27               | 6                | 0              | 6.414073                | -0.482615 | 0.043475  |
| 28               | 1                | 0              | 6.291546                | -1.213840 | -0.821990 |
| 29               | 1                | 0              | 6.268303                | -1.146229 | 0.958542  |
| 30               | 8                | 0              | 7.553363                | 0.207040  | 0.032211  |

---

f.  $\text{HSO}_4^-$  (n=5)

energy = -1092.9779161 a.u.

thermally corrected enthalpy = -1092.652675 a.u.

number of imaginary frequencies = 0

Cartesian Coordinates

| Center<br>Number | Atomic<br>Number | Atomic<br>Type | Coordinates (Angstroms) |           |           |
|------------------|------------------|----------------|-------------------------|-----------|-----------|
|                  |                  |                | X                       | Y         | Z         |
| 1                | 16               | 0              | -5.300035               | -0.196095 | 0.013764  |
| 2                | 8                | 0              | -6.366140               | 1.067243  | -0.130958 |
| 3                | 1                | 0              | -6.886351               | 1.099431  | 0.685498  |
| 4                | 8                | 0              | -5.504066               | -0.757803 | 1.346982  |
| 5                | 8                | 0              | -5.446081               | -1.018642 | -1.172408 |
| 6                | 6                | 0              | -3.736008               | 0.708344  | -0.061235 |
| 7                | 1                | 0              | -3.784954               | 1.286051  | -0.986393 |
| 8                | 1                | 0              | -3.755325               | 1.390655  | 0.790551  |
| 9                | 6                | 0              | -2.525179               | -0.225089 | -0.025293 |
| 10               | 1                | 0              | -2.567730               | -0.907982 | -0.878526 |
| 11               | 1                | 0              | -2.563620               | -0.836778 | 0.881239  |
| 12               | 6                | 0              | -1.214589               | 0.574251  | -0.057762 |
| 13               | 1                | 0              | -1.189936               | 1.265378  | 0.794275  |
| 14               | 1                | 0              | -1.191742               | 1.198208  | -0.960152 |
| 15               | 6                | 0              | 0.036353                | -0.311441 | -0.024198 |
| 16               | 1                | 0              | 0.017908                | -0.996977 | -0.880891 |
| 17               | 1                | 0              | 0.008940                | -0.943167 | 0.872786  |
| 18               | 6                | 0              | 1.343064                | 0.490270  | -0.041274 |
| 19               | 1                | 0              | 1.356368                | 1.174523  | 0.817518  |
| 20               | 1                | 0              | 1.363457                | 1.127298  | -0.935518 |
| 21               | 6                | 0              | 2.607424                | -0.376334 | -0.012422 |
| 22               | 1                | 0              | 2.599879                | -1.056230 | -0.874828 |
| 23               | 1                | 0              | 2.586083                | -1.017793 | 0.878793  |
| 24               | 6                | 0              | 3.910125                | 0.434654  | -0.019366 |
| 25               | 1                | 0              | 3.913203                | 1.115194  | 0.843026  |
| 26               | 1                | 0              | 3.927569                | 1.077995  | -0.909698 |
| 27               | 6                | 0              | 5.183535                | -0.420043 | 0.009601  |
| 28               | 1                | 0              | 5.176144                | -1.100015 | -0.854441 |
| 29               | 1                | 0              | 5.159628                | -1.065020 | 0.899854  |
| 30               | 6                | 0              | 6.488943                | 0.381209  | 0.006154  |
| 31               | 1                | 0              | 6.522656                | 1.054579  | 0.873926  |
| 32               | 1                | 0              | 6.541073                | 1.017120  | -0.888538 |
| 33               | 6                | 0              | 7.794409                | -0.486955 | 0.038314  |
| 34               | 1                | 0              | 7.675479                | -1.204609 | -0.838753 |
| 35               | 1                | 0              | 7.656748                | -1.166670 | 0.942541  |
| 36               | 8                | 0              | 8.929613                | 0.210843  | 0.035433  |

g. HSO<sub>4</sub><sup>-</sup> (n=6)

energy = -1171.6258678 a.u.

thermally corrected enthalpy = -1171.241349 a.u.

number of imaginary frequencies = 0

Cartesian Coordinates

| Center<br>Number | Atomic<br>Number | Atomic<br>Type | Coordinates (Angstroms) |           |           |
|------------------|------------------|----------------|-------------------------|-----------|-----------|
|                  |                  |                | X                       | Y         | Z         |
| 1                | 16               | 0              | -6.507205               | -0.209876 | 0.018538  |
| 2                | 8                | 0              | -7.588066               | 1.038584  | -0.116308 |
| 3                | 1                | 0              | -8.072858               | 1.101033  | 0.721590  |
| 4                | 8                | 0              | -6.693304               | -0.786125 | 1.347927  |
| 5                | 8                | 0              | -6.644231               | -1.022880 | -1.175467 |
| 6                | 6                | 0              | -4.950572               | 0.710060  | -0.052755 |
| 7                | 1                | 0              | -5.005305               | 1.293926  | -0.973679 |
| 8                | 1                | 0              | -4.973540               | 1.386299  | 0.804041  |
| 9                | 6                | 0              | -3.733988               | -0.215878 | -0.024914 |
| 10               | 1                | 0              | -3.775293               | -0.894062 | -0.881998 |
| 11               | 1                | 0              | -3.767976               | -0.833375 | 0.877858  |
| 12               | 6                | 0              | -2.426483               | 0.588296  | -0.055356 |
| 13               | 1                | 0              | -2.401418               | 1.273258  | 0.801499  |
| 14               | 1                | 0              | -2.407863               | 1.218628  | -0.953280 |
| 15               | 6                | 0              | -1.174244               | -0.295656 | -0.031650 |
| 16               | 1                | 0              | -1.193975               | -0.975068 | -0.893022 |
| 17               | 1                | 0              | -1.198200               | -0.933669 | 0.860814  |
| 18               | 6                | 0              | 0.131068                | 0.508092  | -0.046572 |
| 19               | 1                | 0              | 0.145815                | 1.187086  | 0.816058  |
| 20               | 1                | 0              | 0.149813                | 1.149760  | -0.937226 |
| 21               | 6                | 0              | 1.394334                | -0.360060 | -0.024724 |
| 22               | 1                | 0              | 1.384763                | -1.035218 | -0.890400 |
| 23               | 1                | 0              | 1.374524                | -1.005616 | 0.863132  |
| 24               | 6                | 0              | 2.694879                | 0.451937  | -0.030279 |
| 25               | 1                | 0              | 2.700871                | 1.127399  | 0.835605  |
| 26               | 1                | 0              | 2.711717                | 1.099048  | -0.917414 |
| 27               | 6                | 0              | 3.966332                | -0.404582 | -0.008199 |
| 28               | 1                | 0              | 3.963695                | -1.077848 | -0.875970 |
| 29               | 1                | 0              | 3.949349                | -1.053791 | 0.877589  |
| 30               | 6                | 0              | 5.264244                | 0.413846  | -0.008502 |
| 31               | 1                | 0              | 5.263778                | 1.087529  | 0.859233  |
| 32               | 1                | 0              | 5.278186                | 1.064449  | -0.893564 |
| 33               | 6                | 0              | 6.542492                | -0.434048 | 0.013348  |
| 34               | 1                | 0              | 6.538104                | -1.107644 | -0.855678 |
| 35               | 1                | 0              | 6.522521                | -1.085959 | 0.898587  |
| 36               | 6                | 0              | 7.843495                | 0.374609  | 0.014990  |
| 37               | 1                | 0              | 7.874018                | 1.040891  | 0.888206  |

|    |   |   |           |           |           |
|----|---|---|-----------|-----------|-----------|
| 38 | 1 | 0 | 7.889693  | 1.018984  | -0.873854 |
| 39 | 6 | 0 | 9.151512  | -0.485700 | 0.037233  |
| 40 | 1 | 0 | 9.040902  | -1.196805 | -0.843917 |
| 41 | 1 | 0 | 9.025282  | -1.173843 | 0.934446  |
| 42 | 8 | 0 | 10.285632 | 0.217560  | 0.038727  |

---

### 3. B3LYP/6-311++G(p,d) calculations for CH<sub>3</sub>CH<sub>2</sub>OH and its n=1–6 alkylogues

a. CH<sub>3</sub>CH<sub>2</sub>OH (n=0)

energy = -155.09515 a.u.

thermally corrected enthalpy = -155.010309 a.u.

number of imaginary frequencies = 0

Cartesian Coordinates

---

| Center<br>Number | Atomic<br>Number | Atomic<br>Type | Coordinates (Angstroms) |           |           |
|------------------|------------------|----------------|-------------------------|-----------|-----------|
|                  |                  |                | X                       | Y         | Z         |
| 1                | 6                | 0              | 1.223893                | -0.223523 | -0.000037 |
| 2                | 1                | 0              | 1.292233                | -0.859486 | -0.885816 |
| 3                | 6                | 0              | -0.081510               | 0.549683  | 0.000039  |
| 4                | 1                | 0              | -0.139556               | 1.194282  | -0.887544 |
| 5                | 1                | 0              | -0.139471               | 1.194160  | 0.887711  |
| 6                | 8                | 0              | -1.155382               | -0.396163 | 0.000076  |
| 7                | 1                | 0              | -1.991180               | 0.079601  | -0.000570 |
| 8                | 1                | 0              | 2.074568                | 0.463732  | 0.000181  |
| 9                | 1                | 0              | 1.292166                | -0.859943 | 0.885423  |

---

b. CH<sub>3</sub>CH<sub>2</sub>OH (n=1)

energy = -233.7436282 a.u.

thermally corrected enthalpy = -233.599301 a.u.

number of imaginary frequencies = 0

Cartesian Coordinates

| Center<br>Number | Atomic<br>Number | Atomic<br>Type | Coordinates (Angstroms) |           |           |
|------------------|------------------|----------------|-------------------------|-----------|-----------|
|                  |                  |                | X                       | Y         | Z         |
| 1                | 6                | 0              | 0.033534                | -0.339119 | 0.000069  |
| 2                | 1                | 0              | 0.037813                | -0.993586 | 0.878881  |
| 3                | 1                | 0              | 0.037946                | -0.993708 | -0.878655 |
| 4                | 6                | 0              | 1.315645                | 0.478341  | 0.000090  |
| 5                | 1                | 0              | 1.348303                | 1.125148  | 0.888239  |
| 6                | 1                | 0              | 1.348180                | 1.125304  | -0.887949 |
| 7                | 8                | 0              | 2.423713                | -0.426793 | -0.000098 |
| 8                | 1                | 0              | 3.240642                | 0.080581  | 0.000042  |
| 9                | 6                | 0              | -1.229799               | 0.528849  | -0.000090 |
| 10               | 1                | 0              | -1.220574               | 1.187893  | 0.876645  |
| 11               | 1                | 0              | -1.220543               | 1.187617  | -0.877030 |
| 12               | 6                | 0              | -2.520068               | -0.296443 | 0.000013  |
| 13               | 1                | 0              | -2.576459               | -0.940407 | 0.883041  |
| 14               | 1                | 0              | -3.404508               | 0.346495  | -0.000159 |
| 15               | 1                | 0              | -2.576376               | -0.940763 | -0.882762 |



c. CH<sub>3</sub>CH<sub>2</sub>OH (n=2)

energy = -312.3924133 a.u.

thermally corrected enthalpy = -312.188679 a.u.

number of imaginary frequencies = 0

Cartesian Coordinates

| Center<br>Number | Atomic<br>Number | Atomic<br>Type | Coordinates (Angstroms) |           |           |
|------------------|------------------|----------------|-------------------------|-----------|-----------|
|                  |                  |                | X                       | Y         | Z         |
| 1                | 6                | 0              | -1.253363               | -0.344889 | 0.000095  |
| 2                | 1                | 0              | -1.258713               | -1.004715 | 0.877212  |
| 3                | 1                | 0              | -1.258958               | -1.005684 | -0.876290 |
| 4                | 6                | 0              | 0.036303                | 0.483759  | -0.000548 |
| 5                | 1                | 0              | 0.039586                | 1.143718  | 0.876642  |
| 6                | 1                | 0              | 0.039035                | 1.143183  | -0.878140 |
| 7                | 6                | 0              | 1.306551                | -0.374117 | -0.000723 |
| 8                | 1                | 0              | 1.318080                | -1.027431 | -0.880131 |
| 9                | 1                | 0              | 1.317205                | -1.029118 | 0.877442  |
| 10               | 6                | 0              | 2.581308                | 0.455036  | 0.000673  |
| 11               | 1                | 0              | 2.607895                | 1.101080  | 0.889531  |
| 12               | 1                | 0              | 2.608560                | 1.103071  | -0.886715 |
| 13               | 8                | 0              | 3.697546                | -0.440242 | 0.000102  |
| 14               | 1                | 0              | 4.509916                | 0.074422  | 0.000504  |
| 15               | 6                | 0              | -2.529486               | 0.504308  | -0.000205 |
| 16               | 1                | 0              | -2.523678               | 1.164411  | 0.875822  |
| 17               | 1                | 0              | -2.523930               | 1.163418  | -0.876981 |
| 18               | 6                | 0              | -3.812201               | -0.332516 | 0.000448  |
| 19               | 1                | 0              | -3.863174               | -0.977047 | 0.883719  |
| 20               | 1                | 0              | -4.703450               | 0.301199  | 0.000206  |
| 21               | 1                | 0              | -3.863413               | -0.978059 | -0.882070 |

d. CH<sub>3</sub>CH<sub>2</sub>OH (n=3)

energy = -391.0411172 a.u.

thermally corrected enthalpy = -390.777979 a.u.

number of imaginary frequencies = 0

Cartesian Coordinates

---

| Center<br>Number | Atomic<br>Number | Atomic<br>Type | Coordinates (Angstroms) |           |           |
|------------------|------------------|----------------|-------------------------|-----------|-----------|
|                  |                  |                | X                       | Y         | Z         |
| 1                | 6                | 0              | -2.541716               | -0.355937 | 0.000086  |
| 2                | 1                | 0              | -2.545673               | -1.016323 | 0.877127  |
| 3                | 1                | 0              | -2.545911               | -1.017029 | -0.876422 |
| 4                | 6                | 0              | -1.254704               | 0.476503  | -0.000431 |
| 5                | 1                | 0              | -1.251258               | 1.137146  | 0.876318  |
| 6                | 1                | 0              | -1.251665               | 1.136640  | -0.877566 |
| 7                | 6                | 0              | 0.023504                | -0.369705 | -0.000494 |
| 8                | 1                | 0              | 0.021224                | -1.029432 | -0.877490 |
| 9                | 1                | 0              | 0.020877                | -1.030130 | 0.875977  |
| 10               | 6                | 0              | 1.310515                | 0.463436  | 0.000073  |
| 11               | 1                | 0              | 1.311215                | 1.122770  | 0.877746  |
| 12               | 1                | 0              | 1.311452                | 1.123580  | -0.876991 |
| 13               | 6                | 0              | 2.583597                | -0.390032 | -0.000152 |
| 14               | 1                | 0              | 2.597117                | -1.043799 | -0.879219 |
| 15               | 1                | 0              | 2.596913                | -1.044574 | 0.878341  |
| 16               | 6                | 0              | 3.855445                | 0.443595  | 0.000360  |
| 17               | 1                | 0              | 3.879995                | 1.090344  | 0.888770  |
| 18               | 1                | 0              | 3.880165                | 1.091167  | -0.887448 |
| 19               | 8                | 0              | 4.974944                | -0.447598 | 0.000045  |
| 20               | 1                | 0              | 5.785399                | 0.070077  | 0.000688  |
| 21               | 6                | 0              | -3.821559               | 0.487995  | -0.000081 |
| 22               | 1                | 0              | -3.818095               | 1.148087  | 0.875953  |
| 23               | 1                | 0              | -3.818338               | 1.147368  | -0.876658 |
| 24               | 6                | 0              | -5.101353               | -0.353334 | 0.000437  |
| 25               | 1                | 0              | -5.150029               | -0.998270 | 0.883598  |
| 26               | 1                | 0              | -5.995037               | 0.277028  | 0.000305  |
| 27               | 1                | 0              | -5.150273               | -0.998987 | -0.882186 |

---

e. CH<sub>3</sub>CH<sub>2</sub>OH (n=4)

energy = -469.6898146 a.u.

thermally corrected enthalpy = -469.367271 a.u.

number of imaginary frequencies = 0

Cartesian Coordinates

| Center<br>Number | Atomic<br>Number | Atomic<br>Type | Coordinates (Angstroms) |           |           |
|------------------|------------------|----------------|-------------------------|-----------|-----------|
|                  |                  |                | X                       | Y         | Z         |
| 1                | 6                | 0              | -3.828733               | -0.364968 | 0.000006  |
| 2                | 1                | 0              | -3.831570               | -1.025758 | 0.876805  |
| 3                | 1                | 0              | -3.831832               | -1.025801 | -0.876760 |
| 4                | 6                | 0              | -2.543128               | 0.469619  | -0.000205 |
| 5                | 1                | 0              | -2.540922               | 1.130165  | 0.876635  |
| 6                | 1                | 0              | -2.541196               | 1.130139  | -0.877067 |
| 7                | 6                | 0              | -1.262798               | -0.373520 | -0.000395 |
| 8                | 1                | 0              | -1.264896               | -1.033854 | -0.877282 |
| 9                | 1                | 0              | -1.264900               | -1.034253 | 0.876193  |
| 10               | 6                | 0              | 0.023025                | 0.461097  | -0.000212 |
| 11               | 1                | 0              | 0.025194                | 1.121395  | 0.876815  |
| 12               | 1                | 0              | 0.025235                | 1.121739  | -0.876980 |
| 13               | 6                | 0              | 1.302453                | -0.382955 | -0.000341 |
| 14               | 1                | 0              | 1.301244                | -1.042886 | -0.877204 |
| 15               | 1                | 0              | 1.301139                | -1.043291 | 0.876217  |
| 16               | 6                | 0              | 2.588039                | 0.452402  | -0.000061 |
| 17               | 1                | 0              | 2.587585                | 1.112027  | 0.877394  |
| 18               | 1                | 0              | 2.587781                | 1.112311  | -0.877303 |
| 19               | 6                | 0              | 3.862594                | -0.398803 | -0.000044 |
| 20               | 1                | 0              | 3.877262                | -1.052833 | -0.878901 |
| 21               | 1                | 0              | 3.877052                | -1.053106 | 0.878615  |
| 22               | 6                | 0              | 5.133036                | 0.436912  | 0.000247  |
| 23               | 1                | 0              | 5.156461                | 1.084050  | 0.888402  |
| 24               | 1                | 0              | 5.156768                | 1.084204  | -0.887784 |
| 25               | 8                | 0              | 6.254090                | -0.452387 | 0.000375  |
| 26               | 1                | 0              | 7.063620                | 0.066734  | 0.000076  |
| 27               | 6                | 0              | -5.110109               | 0.476580  | 0.000176  |
| 28               | 1                | 0              | -5.107754               | 1.136404  | 0.876420  |
| 29               | 1                | 0              | -5.108025               | 1.136344  | -0.876114 |
| 30               | 6                | 0              | -6.388549               | -0.366768 | 0.000403  |
| 31               | 1                | 0              | -6.436213               | -1.012134 | 0.883320  |
| 32               | 1                | 0              | -7.283266               | 0.262138  | 0.000511  |
| 33               | 1                | 0              | -6.436477               | -1.012205 | -0.882448 |

f. CH<sub>3</sub>CH<sub>2</sub>OH (n=5)

energy = -548.3385055 a.u.

thermally corrected enthalpy = -547.956559 a.u.

number of imaginary frequencies = 0

Cartesian Coordinates

| Center<br>Number | Atomic<br>Number | Atomic<br>Type | Coordinates (Angstroms) |           |           |
|------------------|------------------|----------------|-------------------------|-----------|-----------|
|                  |                  |                | X                       | Y         | Z         |
| 1                | 6                | 0              | -5.114774               | -0.371896 | 0.000069  |
| 2                | 1                | 0              | -5.116907               | -1.032634 | 0.876923  |
| 3                | 1                | 0              | -5.117155               | -1.032816 | -0.876647 |
| 4                | 6                | 0              | -3.830054               | 0.464069  | -0.000203 |
| 5                | 1                | 0              | -3.828542               | 1.124670  | 0.876585  |
| 6                | 1                | 0              | -3.828846               | 1.124560  | -0.877076 |
| 7                | 6                | 0              | -2.548658               | -0.377572 | -0.000371 |
| 8                | 1                | 0              | -2.550104               | -1.037927 | -0.877298 |
| 9                | 1                | 0              | -2.550158               | -1.038374 | 0.876219  |
| 10               | 6                | 0              | -1.263614               | 0.458257  | -0.000131 |
| 11               | 1                | 0              | -1.262044               | 1.118606  | 0.876847  |
| 12               | 1                | 0              | -1.261998               | 1.119035  | -0.876786 |
| 13               | 6                | 0              | 0.017313                | -0.383876 | -0.000303 |
| 14               | 1                | 0              | 0.015763                | -1.044234 | -0.877187 |
| 15               | 1                | 0              | 0.015741                | -1.044610 | 0.876297  |
| 16               | 6                | 0              | 1.302454                | 0.451808  | -0.000110 |
| 17               | 1                | 0              | 1.304025                | 1.112148  | 0.876889  |
| 18               | 1                | 0              | 1.304117                | 1.112412  | -0.876910 |
| 19               | 6                | 0              | 2.582651                | -0.391094 | -0.000166 |
| 20               | 1                | 0              | 2.582040                | -1.051101 | -0.876973 |
| 21               | 1                | 0              | 2.581950                | -1.051345 | 0.876458  |
| 22               | 6                | 0              | 3.867471                | 0.445461  | 0.000020  |
| 23               | 1                | 0              | 3.866437                | 1.105134  | 0.877440  |
| 24               | 1                | 0              | 3.866574                | 1.105309  | -0.877268 |
| 25               | 6                | 0              | 5.142843                | -0.404534 | 0.000039  |
| 26               | 1                | 0              | 5.158096                | -1.058603 | -0.878783 |
| 27               | 1                | 0              | 5.157968                | -1.058753 | 0.878753  |
| 28               | 6                | 0              | 6.412473                | 0.432432  | 0.000210  |
| 29               | 1                | 0              | 6.435325                | 1.079623  | 0.888347  |
| 30               | 1                | 0              | 6.435504                | 1.079716  | -0.887853 |
| 31               | 8                | 0              | 7.534428                | -0.455740 | 0.000281  |
| 32               | 1                | 0              | 8.343415                | 0.064231  | 0.000172  |
| 33               | 6                | 0              | -6.397124               | 0.468192  | 0.000159  |
| 34               | 1                | 0              | -6.395527               | 1.128092  | 0.876348  |
| 35               | 1                | 0              | -6.395781               | 1.127892  | -0.876182 |
| 36               | 6                | 0              | -7.674626               | -0.376612 | 0.000439  |
| 37               | 1                | 0              | -7.721547               | -1.021969 | 0.883416  |

|    |   |   |           |           |           |
|----|---|---|-----------|-----------|-----------|
| 38 | 1 | 0 | -8.570101 | 0.251239  | 0.000482  |
| 39 | 1 | 0 | -7.721786 | -1.022187 | -0.882366 |

---

g. CH<sub>3</sub>CH<sub>2</sub>OH (n=6)

energy = -626.9871897 a.u.

thermally corrected enthalpy = -626.545835 a.u.

number of imaginary frequencies = 0

Cartesian Coordinates

---

| Center<br>Number | Atomic<br>Number | Atomic<br>Type | Coordinates (Angstroms) |           |           |
|------------------|------------------|----------------|-------------------------|-----------|-----------|
|                  |                  |                | X                       | Y         | Z         |
| 1                | 6                | 0              | -6.400053               | -0.377510 | -0.000041 |
| 2                | 1                | 0              | -6.401822               | -1.038370 | 0.876735  |
| 3                | 1                | 0              | -6.401887               | -1.038341 | -0.876838 |
| 4                | 6                | 0              | -5.115916               | 0.459346  | -0.000079 |
| 5                | 1                | 0              | -5.115015               | 1.119917  | 0.876751  |
| 6                | 1                | 0              | -5.115090               | 1.119951  | -0.876884 |
| 7                | 6                | 0              | -3.833928               | -0.381284 | -0.000153 |
| 8                | 1                | 0              | -3.834871               | -1.041749 | -0.877016 |
| 9                | 1                | 0              | -3.834976               | -1.042064 | 0.876473  |
| 10               | 6                | 0              | -2.549435               | 0.455411  | 0.000064  |
| 11               | 1                | 0              | -2.548374               | 1.115881  | 0.876953  |
| 12               | 1                | 0              | -2.548267               | 1.116161  | -0.876613 |
| 13               | 6                | 0              | -1.267836               | -0.385693 | 0.000010  |
| 14               | 1                | 0              | -1.269003               | -1.046224 | -0.876797 |
| 15               | 1                | 0              | -1.269037               | -1.046390 | 0.876690  |
| 16               | 6                | 0              | 0.016847                | 0.450683  | 0.000109  |
| 17               | 1                | 0              | 0.018075                | 1.111218  | 0.876948  |
| 18               | 1                | 0              | 0.018134                | 1.111320  | -0.876654 |
| 19               | 6                | 0              | 1.298216                | -0.390743 | 0.000102  |
| 20               | 1                | 0              | 1.297017                | -1.051312 | -0.876625 |
| 21               | 1                | 0              | 1.297031                | -1.051306 | 0.876834  |
| 22               | 6                | 0              | 2.582894                | 0.445639  | 0.000084  |
| 23               | 1                | 0              | 2.584139                | 1.106157  | 0.876950  |
| 24               | 1                | 0              | 2.584135                | 1.106114  | -0.876814 |
| 25               | 6                | 0              | 3.863581                | -0.396497 | 0.000100  |
| 26               | 1                | 0              | 3.863289                | -1.056707 | -0.876556 |
| 27               | 1                | 0              | 3.863350                | -1.056584 | 0.876849  |
| 28               | 6                | 0              | 5.147903                | 0.440803  | -0.000007 |
| 29               | 1                | 0              | 5.146586                | 1.100648  | 0.877284  |
| 30               | 1                | 0              | 5.146524                | 1.100511  | -0.877402 |

|    |   |   |           |           |           |
|----|---|---|-----------|-----------|-----------|
| 31 | 6 | 0 | 6.423762  | -0.408444 | 0.000013  |
| 32 | 1 | 0 | 6.439280  | -1.062689 | -0.878671 |
| 33 | 1 | 0 | 6.439375  | -1.062492 | 0.878843  |
| 34 | 6 | 0 | 7.692934  | 0.429196  | -0.000142 |
| 35 | 1 | 0 | 7.715541  | 1.076602  | 0.887837  |
| 36 | 1 | 0 | 7.715532  | 1.076293  | -0.888344 |
| 37 | 8 | 0 | 8.815358  | -0.458395 | 0.000017  |
| 38 | 1 | 0 | 9.624077  | 0.061989  | -0.000592 |
| 39 | 6 | 0 | -7.682995 | 0.461644  | 0.000017  |
| 40 | 1 | 0 | -7.681954 | 1.121423  | 0.876297  |
| 41 | 1 | 0 | -7.681982 | 1.121496  | -0.876208 |
| 42 | 6 | 0 | -8.959930 | -0.383985 | -0.000001 |
| 43 | 1 | 0 | -9.006557 | -1.029518 | 0.882862  |
| 44 | 1 | 0 | -9.855809 | 0.243282  | 0.000027  |
| 45 | 1 | 0 | -9.006570 | -1.029457 | -0.882909 |

---

#### 4. B3LYP/6-311++G(p,d) calculations for CH<sub>3</sub>CH<sub>2</sub>O<sup>-</sup> and its n=1–6 alkylogues

a. CH<sub>3</sub>CH<sub>2</sub>O<sup>-</sup> (n=0)

energy = -154.4829553 a.u.

thermally corrected enthalpy = -154.414423 a.u.

number of imaginary frequencies = 0

Cartesian Coordinates

---

| Center<br>Number | Atomic<br>Number | Atomic<br>Type | Coordinates (Angstroms) |           |           |
|------------------|------------------|----------------|-------------------------|-----------|-----------|
|                  |                  |                | X                       | Y         | Z         |
| 1                | 6                | 0              | 1.183385                | -0.204704 | 0.000010  |
| 2                | 1                | 0              | 1.279462                | -0.845225 | -0.886015 |
| 3                | 6                | 0              | -0.218648               | 0.484213  | 0.000007  |
| 4                | 1                | 0              | -0.185663               | 1.192616  | -0.890560 |
| 5                | 1                | 0              | -0.185752               | 1.192975  | 0.890307  |
| 6                | 8                | 0              | -1.247828               | -0.363171 | 0.000009  |
| 7                | 1                | 0              | 2.006471                | 0.532578  | -0.000332 |
| 8                | 1                | 0              | 1.279686                | -0.844630 | 0.886428  |

---

b. CH<sub>3</sub>CH<sub>2</sub>O<sup>-</sup> (n=1)

energy = -233.1322338 a.u.

thermally corrected enthalpy = -233.004400 a.u.

number of imaginary frequencies = 0

Cartesian Coordinates

| Center<br>Number | Atomic<br>Number | Atomic<br>Type | Coordinates (Angstroms) |           |           |
|------------------|------------------|----------------|-------------------------|-----------|-----------|
|                  |                  |                | X                       | Y         | Z         |
| 1                | 6                | 0              | 0.093696                | -0.371213 | -0.000231 |
| 2                | 1                | 0              | 0.093413                | -1.028114 | 0.881056  |
| 3                | 1                | 0              | 0.093432                | -1.027665 | -0.881848 |
| 4                | 6                | 0              | 1.454018                | 0.411019  | -0.000042 |
| 5                | 1                | 0              | 1.369803                | 1.116501  | 0.891015  |
| 6                | 1                | 0              | 1.370136                | 1.116748  | -0.890938 |
| 7                | 8                | 0              | 2.544032                | -0.355797 | 0.000156  |
| 8                | 6                | 0              | -1.157157               | 0.511535  | 0.000005  |
| 9                | 1                | 0              | -1.129202               | 1.173667  | 0.876357  |
| 10               | 1                | 0              | -1.129429               | 1.173820  | -0.876228 |
| 11               | 6                | 0              | -2.481857               | -0.262585 | 0.000099  |
| 12               | 1                | 0              | -2.559524               | -0.908882 | 0.881867  |
| 13               | 1                | 0              | -3.353400               | 0.406568  | 0.000205  |
| 14               | 1                | 0              | -2.559690               | -0.908801 | -0.881716 |

c. CH<sub>3</sub>CH<sub>2</sub>O<sup>-</sup> (n=2)

energy = -311.7814683 a.u.

thermally corrected enthalpy = -311.594323 a.u.

number of imaginary frequencies = 0

Cartesian Coordinates

---

| Center<br>Number | Atomic<br>Number | Atomic<br>Type | Coordinates (Angstroms) |           |           |
|------------------|------------------|----------------|-------------------------|-----------|-----------|
|                  |                  |                | X                       | Y         | Z         |
| 1                | 6                | 0              | -1.199912               | -0.356879 | 0.000077  |
| 2                | 1                | 0              | -1.219497               | -1.016932 | 0.878382  |
| 3                | 1                | 0              | -1.221560               | -1.021637 | -0.874651 |
| 4                | 6                | 0              | 0.110907                | 0.440340  | -0.003578 |
| 5                | 1                | 0              | 0.125466                | 1.105334  | 0.872225  |
| 6                | 1                | 0              | 0.122716                | 1.101478  | -0.882259 |
| 7                | 6                | 0              | 1.383051                | -0.414692 | -0.003402 |
| 8                | 1                | 0              | 1.400243                | -1.067254 | -0.887352 |
| 9                | 1                | 0              | 1.395164                | -1.074456 | 0.875301  |
| 10               | 6                | 0              | 2.723070                | 0.399274  | 0.003639  |
| 11               | 1                | 0              | 2.621808                | 1.097862  | 0.898540  |
| 12               | 1                | 0              | 2.624818                | 1.108983  | -0.882790 |
| 13               | 8                | 0              | 3.830499                | -0.342527 | 0.000836  |
| 14               | 6                | 0              | -2.464902               | 0.511496  | -0.000758 |
| 15               | 1                | 0              | -2.445921               | 1.174499  | 0.873661  |
| 16               | 1                | 0              | -2.447672               | 1.170295  | -0.878391 |
| 17               | 6                | 0              | -3.767271               | -0.296789 | 0.002475  |
| 18               | 1                | 0              | -3.828488               | -0.941085 | 0.886265  |
| 19               | 1                | 0              | -4.650352               | 0.351674  | 0.001958  |
| 20               | 1                | 0              | -3.830375               | -0.945048 | -0.878282 |

---



d. CH<sub>3</sub>CH<sub>2</sub>O<sup>-</sup> (n=3)

energy = -390.4303577 a.u.

thermally corrected enthalpy = -390.183842 a.u.

number of imaginary frequencies = 0

Cartesian Coordinates

| Center<br>Number | Atomic<br>Number | Atomic<br>Type | Coordinates (Angstroms) |           |           |
|------------------|------------------|----------------|-------------------------|-----------|-----------|
|                  |                  |                | X                       | Y         | Z         |
| 1                | 6                | 0              | -2.486728               | -0.352670 | 0.000353  |
| 2                | 1                | 0              | -2.498363               | -1.012663 | 0.878334  |
| 3                | 1                | 0              | -2.500056               | -1.016096 | -0.875026 |
| 4                | 6                | 0              | -1.186736               | 0.460282  | -0.002528 |
| 5                | 1                | 0              | -1.174096               | 1.123304  | 0.873199  |
| 6                | 1                | 0              | -1.176422               | 1.120445  | -0.880448 |
| 7                | 6                | 0              | 0.086078                | -0.397362 | -0.002879 |
| 8                | 1                | 0              | 0.073821                | -1.057295 | -0.881016 |
| 9                | 1                | 0              | 0.071595                | -1.061509 | 0.872044  |
| 10               | 6                | 0              | 1.388729                | 0.413283  | 0.000569  |
| 11               | 1                | 0              | 1.394047                | 1.073927  | 0.879568  |
| 12               | 1                | 0              | 1.395704                | 1.078755  | -0.874785 |
| 13               | 6                | 0              | 2.668501                | -0.428629 | -0.000616 |
| 14               | 1                | 0              | 2.691032                | -1.082782 | -0.883363 |
| 15               | 1                | 0              | 2.690308                | -1.086397 | 0.879453  |
| 16               | 6                | 0              | 4.000518                | 0.398794  | 0.001626  |
| 17               | 1                | 0              | 3.892928                | 1.100372  | 0.893635  |
| 18               | 1                | 0              | 3.893928                | 1.103403  | -0.888108 |
| 19               | 8                | 0              | 5.115078                | -0.331858 | 0.000998  |
| 20               | 6                | 0              | -3.758601               | 0.503687  | -0.000128 |
| 21               | 1                | 0              | -3.747195               | 1.165578  | 0.874853  |
| 22               | 1                | 0              | -3.748594               | 1.162587  | -0.877384 |
| 23               | 6                | 0              | -5.050112               | -0.320935 | 0.002309  |
| 24               | 1                | 0              | -5.104389               | -0.965569 | 0.885916  |
| 25               | 1                | 0              | -5.938809               | 0.318431  | 0.002097  |
| 26               | 1                | 0              | -5.105955               | -0.968331 | -0.879178 |

e. CH<sub>3</sub>CH<sub>2</sub>O<sup>-</sup> (n=4)

energy = -469.0791275 a.u.

thermally corrected enthalpy = -468.773226 a.u.

number of imaginary frequencies = 0

Cartesian Coordinates

| Center<br>Number | Atomic<br>Number | Atomic<br>Type | Coordinates (Angstroms) |           |           |
|------------------|------------------|----------------|-------------------------|-----------|-----------|
|                  |                  |                | X                       | Y         | Z         |
| 1                | 6                | 0              | -3.771131               | -0.355955 | 0.000026  |
| 2                | 1                | 0              | -3.779339               | -1.017199 | 0.876812  |
| 3                | 1                | 0              | -3.779379               | -1.017448 | -0.876572 |
| 4                | 6                | 0              | -2.477504               | 0.466654  | -0.000116 |
| 5                | 1                | 0              | -2.470326               | 1.127972  | 0.876540  |
| 6                | 1                | 0              | -2.470414               | 1.127793  | -0.876907 |
| 7                | 6                | 0              | -1.201949               | -0.384158 | -0.000094 |
| 8                | 1                | 0              | -1.209784               | -1.045608 | -0.876781 |
| 9                | 1                | 0              | -1.209920               | -1.045784 | 0.876460  |
| 10               | 6                | 0              | 0.093768                | 0.436015  | 0.000081  |
| 11               | 1                | 0              | 0.101702                | 1.097567  | 0.876945  |
| 12               | 1                | 0              | 0.101776                | 1.097811  | -0.876597 |
| 13               | 6                | 0              | 1.370781                | -0.414894 | 0.000014  |
| 14               | 1                | 0              | 1.361111                | -1.077034 | -0.876578 |
| 15               | 1                | 0              | 1.361093                | -1.077208 | 0.876474  |
| 16               | 6                | 0              | 2.669449                | 0.402261  | 0.000102  |
| 17               | 1                | 0              | 2.672322                | 1.065296  | 0.877368  |
| 18               | 1                | 0              | 2.672325                | 1.065475  | -0.877030 |
| 19               | 6                | 0              | 3.953232                | -0.433418 | 0.000014  |
| 20               | 1                | 0              | 3.978663                | -1.089238 | -0.881436 |
| 21               | 1                | 0              | 3.978733                | -1.089320 | 0.881400  |
| 22               | 6                | 0              | 5.281413                | 0.400415  | 0.000005  |
| 23               | 1                | 0              | 5.170976                | 1.102891  | 0.890874  |
| 24               | 1                | 0              | 5.170909                | 1.102951  | -0.890808 |
| 25               | 8                | 0              | 6.399388                | -0.324996 | -0.000068 |
| 26               | 6                | 0              | -5.046973               | 0.494047  | -0.000063 |
| 27               | 1                | 0              | -5.039879               | 1.154377  | 0.875993  |
| 28               | 1                | 0              | -5.039920               | 1.154126  | -0.876308 |
| 29               | 6                | 0              | -6.333019               | -0.338495 | 0.000085  |
| 30               | 1                | 0              | -6.384859               | -0.984230 | 0.882857  |
| 31               | 1                | 0              | -7.224395               | 0.296424  | 0.000016  |
| 32               | 1                | 0              | -6.384899               | -0.984478 | -0.882504 |

f. CH<sub>3</sub>CH<sub>2</sub>O<sup>-</sup> (n=5)

energy = -547.7278488 a.u.

thermally corrected enthalpy = -547.362551 a.u.

number of imaginary frequencies = 0

Cartesian Coordinates

| Center<br>Number | Atomic<br>Number | Atomic<br>Type | Coordinates (Angstroms) |           |           |
|------------------|------------------|----------------|-------------------------|-----------|-----------|
|                  |                  |                | X                       | Y         | Z         |
| 1                | 6                | 0              | -5.054516               | -0.360980 | 0.000039  |
| 2                | 1                | 0              | -5.060131               | -1.021956 | 0.876908  |
| 3                | 1                | 0              | -5.060227               | -1.022359 | -0.876526 |
| 4                | 6                | 0              | -3.764702               | 0.467340  | -0.000219 |
| 5                | 1                | 0              | -3.759979               | 1.128477  | 0.876404  |
| 6                | 1                | 0              | -3.760151               | 1.128175  | -0.877070 |
| 7                | 6                | 0              | -2.486749               | -0.379453 | -0.000202 |
| 8                | 1                | 0              | -2.491617               | -1.040447 | -0.876974 |
| 9                | 1                | 0              | -2.491831               | -1.040758 | 0.876335  |
| 10               | 6                | 0              | -1.195737               | 0.447645  | 0.000085  |
| 11               | 1                | 0              | -1.190685               | 1.108689  | 0.876929  |
| 12               | 1                | 0              | -1.190547               | 1.109069  | -0.876472 |
| 13               | 6                | 0              | 0.082244                | -0.399533 | 0.000000  |
| 14               | 1                | 0              | 0.076162                | -1.060965 | -0.876721 |
| 15               | 1                | 0              | 0.076107                | -1.061233 | 0.876518  |
| 16               | 6                | 0              | 1.375704                | 0.424139  | 0.000160  |
| 17               | 1                | 0              | 1.381916                | 1.085693  | 0.877034  |
| 18               | 1                | 0              | 1.381954                | 1.085952  | -0.876518 |
| 19               | 6                | 0              | 2.654947                | -0.423442 | 0.000058  |
| 20               | 1                | 0              | 2.646948                | -1.085613 | -0.876530 |
| 21               | 1                | 0              | 2.646979                | -1.085781 | 0.876518  |
| 22               | 6                | 0              | 3.951518                | 0.397019  | 0.000107  |
| 23               | 1                | 0              | 3.952757                | 1.060057  | 0.877375  |
| 24               | 1                | 0              | 3.952718                | 1.060221  | -0.877039 |
| 25               | 6                | 0              | 5.237381                | -0.435467 | -0.000006 |
| 26               | 1                | 0              | 5.264442                | -1.091209 | -0.881464 |
| 27               | 1                | 0              | 5.264536                | -1.091304 | 0.881378  |
| 28               | 6                | 0              | 6.563482                | 0.401669  | -0.000035 |
| 29               | 1                | 0              | 6.451324                | 1.103871  | 0.890832  |
| 30               | 1                | 0              | 6.451258                | 1.103920  | -0.890855 |
| 31               | 8                | 0              | 7.683224                | -0.321022 | -0.000091 |
| 32               | 6                | 0              | -6.333137               | 0.484755  | -0.000083 |
| 33               | 1                | 0              | -6.328401               | 1.145020  | 0.875950  |
| 34               | 1                | 0              | -6.328489               | 1.144625  | -0.876415 |
| 35               | 6                | 0              | -7.615645               | -0.352939 | 0.000169  |
| 36               | 1                | 0              | -7.665306               | -0.998521 | 0.883066  |
| 37               | 1                | 0              | -8.508883               | 0.278954  | 0.000069  |

38 1 0 -7.665390 -0.998917 -0.882434

---

g. CH<sub>3</sub>CH<sub>2</sub>O<sup>-</sup> (n=6)

energy = -626.3765372 a.u.

thermally corrected enthalpy = -625.951842 a.u.

number of imaginary frequencies = 0

Cartesian Coordinates

---

| Center<br>Number | Atomic<br>Number | Atomic<br>Type | Coordinates (Angstroms) |           |           |
|------------------|------------------|----------------|-------------------------|-----------|-----------|
|                  |                  |                | X                       | Y         | Z         |
| 1                | 6                | 0              | -6.337627               | -0.366436 | -0.000057 |
| 2                | 1                | 0              | -6.341623               | -1.027237 | 0.876883  |
| 3                | 1                | 0              | -6.341719               | -1.027767 | -0.876597 |
| 4                | 6                | 0              | -5.050138               | 0.465407  | -0.000387 |
| 5                | 1                | 0              | -5.046991               | 1.126457  | 0.876218  |
| 6                | 1                | 0              | -5.047213               | 1.126063  | -0.877290 |
| 7                | 6                | 0              | -3.770539               | -0.378719 | -0.000370 |
| 8                | 1                | 0              | -3.773537               | -1.039338 | -0.877313 |
| 9                | 1                | 0              | -3.774004               | -1.040045 | 0.876039  |
| 10               | 6                | 0              | -2.482227               | 0.452350  | 0.000275  |
| 11               | 1                | 0              | -2.478899               | 1.112961  | 0.877272  |
| 12               | 1                | 0              | -2.478530               | 1.113713  | -0.876156 |
| 13               | 6                | 0              | -1.202938               | -0.392476 | 0.000177  |
| 14               | 1                | 0              | -1.206892               | -1.053403 | -0.876651 |
| 15               | 1                | 0              | -1.207045               | -1.053850 | 0.876666  |
| 16               | 6                | 0              | 0.086779                | 0.436580  | 0.000480  |
| 17               | 1                | 0              | 0.090816                | 1.097635  | 0.877320  |
| 18               | 1                | 0              | 0.090961                | 1.098003  | -0.876081 |
| 19               | 6                | 0              | 1.366114                | -0.408576 | 0.000401  |
| 20               | 1                | 0              | 1.361037                | -1.070100 | -0.876256 |
| 21               | 1                | 0              | 1.361097                | -1.070189 | 0.876992  |
| 22               | 6                | 0              | 2.658223                | 0.417225  | 0.000383  |
| 23               | 1                | 0              | 2.663404                | 1.078891  | 0.877183  |
| 24               | 1                | 0              | 2.663317                | 1.078955  | -0.876368 |
| 25               | 6                | 0              | 3.938870                | -0.428219 | 0.000281  |
| 26               | 1                | 0              | 3.931873                | -1.090550 | -0.876195 |
| 27               | 1                | 0              | 3.932099                | -1.090429 | 0.876850  |
| 28               | 6                | 0              | 5.234115                | 0.394355  | 0.000045  |
| 29               | 1                | 0              | 5.234411                | 1.057534  | 0.877213  |
| 30               | 1                | 0              | 5.234174                | 1.057392  | -0.877229 |
| 31               | 6                | 0              | 6.521206                | -0.436225 | -0.000069 |
| 32               | 1                | 0              | 6.549084                | -1.092102 | -0.881404 |

|    |   |   |           |           |           |
|----|---|---|-----------|-----------|-----------|
| 33 | 1 | 0 | 6.549389  | -1.091873 | 0.881426  |
| 34 | 6 | 0 | 7.846215  | 0.402670  | -0.000415 |
| 35 | 1 | 0 | 7.733267  | 1.104900  | 0.890321  |
| 36 | 1 | 0 | 7.732991  | 1.104615  | -0.891341 |
| 37 | 8 | 0 | 8.966799  | -0.318692 | -0.000467 |
| 38 | 6 | 0 | -7.618038 | 0.476546  | -0.000247 |
| 39 | 1 | 0 | -7.614842 | 1.136761  | 0.875784  |
| 40 | 1 | 0 | -7.614874 | 1.136309  | -0.876618 |
| 41 | 6 | 0 | -8.898344 | -0.364351 | -0.000011 |
| 42 | 1 | 0 | -8.946686 | -1.009857 | 0.882949  |
| 43 | 1 | 0 | -9.792770 | 0.265616  | -0.000164 |
| 44 | 1 | 0 | -8.946706 | -1.010311 | -0.882638 |

---

- [42] *Gaussian 09 Revision C.01*, M. J. Frisch, G. W. Trucks, H. B. Schlegel, G. E. Scuseria, M. A. Robb, J. R. Cheeseman, G. Scalmani, V. Barone, B. Mennucci, G. A. Petersson, H. Nakatsuji, M. Caricato, X. Li, H. P. Hratchian, A. F. Izmaylov, J. Bloino, G. Zheng, J. L. Sonnenberg, M. Hada, M. Ehara, K. Toyota, R. Fukuda, J. Hasegawa, M. Ishida, T. Nakajima, Y. Honda, O. Kitao, H. Nakai, T. Vreven, J. A. J. Montgomery, J. E. Peralta, F. Ogliaro, M. Bearpark, J. J. Heyd, E. Brothers, K. N. Kudin, V. N. Staroverov, T. Keith, R. Kobayashi, J. Normand, K. Raghavachari, A. Rendell, J. C. Burant, S. S. Iyengar, J. Tomasi, M. Cossi, N. Rega, J. M. Millam, M. Klene, J. E. Knox, J. B. Cross, V. Bakken, C. Adamo, J. Jaramillo, R. Gomperts, R. E. Stratmann, O. Yazyev, A. J. Austin, R. Cammi, C. Pomelli, J. W. Ochterski, R. L. Martin, K. Morokuma, V. G. Zakrzewski, G. A. Voth, P. Salvador, J. J. Dannenberg, S. Dapprich, A. D. Daniels, O. Farkas, J. B. Foresman, J. V. Ortiz, J. Cioslowski, D. J. Fox., Gaussian, Inc.: Wallingford, CT, **2010**.
